# Supplementary material
Source: MDPI journal article supplement (https://www.mdpi.com/2306-5338/9/8/150)
Supplement: s1 [file s1]

## Supplementary material

### Hydrology MDPI

# Prediction at Ungauged Catchments through Parameter Optimization and Uncertainty Estimation to Quantify the Regional Water Balance of the Ethiopian Rift Valley Lake Basin

Tesfalem Abraham<sup>1,3\*</sup>, Yan Liu<sup>2,3</sup>, Sirak Tekleab<sup>1</sup>, Andreas Hartmann<sup>2,3</sup>

<sup>1</sup>Department of Water Resources and Irrigation Engineering, Institute of Technology, Hawassa University, 05 Hawassa, Ethiopia

<sup>2</sup>Institute of Groundwater Management, Dresden University of Technology, 01069 Dresden, Germany

<sup>3</sup>Faculty of Environment and Natural Resources, University of Freiburg, 79098 Freiburg, Germany

\* Correspondence: tesfalem.abraham@hydrology.uni-freiburg.de

ORCID ID: 0000-0003-1509-2967

**Table S1.** Correlation coefficients (CC) between catchment properties and model parameters.

| CC                                              | $\beta$ | $F_c$ | $K_0$ | $K_1$ | $K_2$ | $L_P$ | $M_{MAXBAS}$ | $P_{MAX}$ | $V_{UZL}$ |
|-------------------------------------------------|---------|-------|-------|-------|-------|-------|--------------|-----------|-----------|
| (a) Correlation coefficient on the normal scale |         |       |       |       |       |       |              |           |           |
| Drainage area                                   | 0.24    | 0.18  | 0.22  | -0.44 | 0.2   | 0.31  | 0.11         | -0.15     | -0.07     |
| Drainage density                                | -0.04   | -0.3  | -0.05 | 0.57  | -0.05 | -0.21 | -0.25        | -0.2      | -0.46     |
| Slope                                           | -0.7    | 0.52  | 0.01  | -0.03 | -0.45 | -0.03 | 0.65         | 0.41      | 0.41      |
| Elevation                                       | 0.6     | -0.46 | -0.03 | 0.42  | 0.05  | 0.27  | -0.21        | -0.54     | -0.14     |
| Catchment index                                 | -0.32   | 0.14  | -0.12 | 0.17  | -0.43 | 0.04  | 0.52         | 0.19      | 0.12      |
| Permeability                                    | -0.09   | 0.08  | 0.35  | -0.45 | -0.01 | 0.3   | 0.23         | -0.09     | 0.06      |
| Porosity                                        | 0       | -0.01 | -0.34 | 0.31  | -0.13 | -0.32 | -0.08        | 0.19      | 0.02      |
| P/PE (Wi)                                       | -0.61   | 0.43  | 0.35  | -0.28 | -0.47 | -0.05 | 0.52         | 0.32      | 0.41      |
| Annual RF                                       | -0.67   | 0.38  | 0.27  | -0.3  | -0.5  | -0.2  | 0.48         | 0.44      | 0.44      |
| (b) Rank correlation coefficient                |         |       |       |       |       |       |              |           |           |
| Drainage area                                   | 0.17    | 0.06  | 0.23  | -0.63 | 0.38  | 0.25  | 0.02         | 0.00      | 0.04      |
| Drainage density                                | -0.13   | -0.28 | -0.08 | 0.62  | -0.29 | -0.34 | -0.19        | -0.05     | -0.27     |
| Slope                                           | -0.68   | 0.57  | -0.18 | -0.02 | -0.28 | -0.13 | 0.55         | 0.36      | 0.50      |
| Elevation                                       | 0.49    | -0.40 | 0.01  | 0.51  | -0.16 | 0.34  | -0.16        | -0.49     | -0.26     |
| Catchment index                                 | -0.16   | -0.11 | -0.09 | 0.37  | -0.43 | 0.04  | 0.27         | -0.09     | -0.11     |

|                                             |       |       |       |       |       |       |       |       |       |
|---------------------------------------------|-------|-------|-------|-------|-------|-------|-------|-------|-------|
| Permeability                                | 0.26  | 0.12  | 0.14  | -0.33 | 0.25  | 0.51  | 0.26  | -0.08 | 0.15  |
| Porosity                                    | -0.30 | -0.06 | -0.19 | 0.22  | -0.31 | -0.55 | -0.05 | 0.26  | 0.04  |
| P/PE (Wi)                                   | -0.70 | 0.35  | 0.29  | -0.23 | -0.22 | -0.16 | 0.42  | 0.41  | 0.42  |
| Annual RF                                   | -0.68 | 0.34  | 0.20  | -0.28 | -0.32 | -0.23 | 0.42  | 0.47  | 0.54  |
| (c) Log transformed correlation coefficient |       |       |       |       |       |       |       |       |       |
| Drainage area                               | 0.20  | 0.03  | 0.34  | -0.57 | 0.23  | 0.34  | 0.09  | 0.02  | 0.06  |
| Drainage density                            | -0.08 | -0.25 | -0.17 | 0.56  | -0.19 | -0.26 | -0.23 | -0.23 | -0.36 |
| Slope                                       | -0.68 | 0.53  | -0.19 | -0.13 | -0.32 | -0.10 | 0.54  | 0.40  | 0.58  |
| Elevation                                   | 0.61  | -0.30 | -0.09 | 0.58  | -0.17 | 0.31  | -0.14 | -0.53 | -0.37 |
| Catchment index                             | -0.21 | 0.08  | -0.30 | 0.29  | -0.44 | 0.07  | 0.36  | -0.04 | -0.07 |
| Permeability                                | 0.19  | -0.08 | -0.27 | 0.63  | -0.02 | -0.31 | -0.23 | -0.04 | -0.11 |
| Porosity                                    | 0.18  | -0.09 | -0.29 | 0.54  | -0.11 | -0.27 | -0.13 | 0.01  | -0.05 |
| P/PE (Wi)                                   | -0.61 | 0.39  | 0.21  | -0.43 | -0.28 | -0.14 | 0.51  | 0.34  | 0.41  |
| Annual RF                                   | -0.67 | 0.31  | 0.12  | -0.39 | -0.29 | -0.28 | 0.45  | 0.40  | 0.46  |

*For permeability the Log transformation results in the complex numbers, thus the absolute values of the variables were taken for the correlation analysis.*

**Table S2.** Catchment properties that are derived for streamflow prediction in the ungauged catchments using the 14 parameter sets obtained by the weighted regression.

| Ungauged<br>cats no | Area<br>[km <sup>2</sup> ] | DD<br>[km/km <sup>2</sup> ] | Mean<br>slope<br>[%] | Mean<br>Elev[m] | Cat<br>Index<br>[m/km] | Permeability<br>[log10 m <sup>2</sup> ] | Porosity<br>[-] | Wi [-] | P [mm] |
|---------------------|----------------------------|-----------------------------|----------------------|-----------------|------------------------|-----------------------------------------|-----------------|--------|--------|
| 1                   | 5324.01                    | 0.075                       | 16.22                | 2037.1          | 10.07                  | -12.194                                 | 0.07            | 0.85   | 923.6  |
| 2                   | 591.54                     | 0.21                        | 13.99                | 719.63          | 10.12                  | -10.73                                  | 0.06            | 0.86   | 842.6  |
| 3                   | 181.16                     | 0.5                         | 13.49                | 1772.8          | 17.27                  | -12.07                                  | 0.022           | 1.06   | 1140.1 |
| 4                   | 130.86                     | 0.3                         | 21.13                | 1795.4          | 10.92                  | -12.34                                  | 0.087           | 1.04   | 1140.1 |
| 5                   | 151.33                     | 0.56                        | 21.55                | 1557.7          | 43.55                  | -11.51                                  | 0.048           | 0.85   | 928.9  |
| 6                   | 185.1                      | 0.44                        | 29.6                 | 2237.9          | 57.08                  | -11.58                                  | 0.106           | 1.03   | 1265.5 |
| 7                   | 1791.1                     | 0.12                        | 25.73                | 1236.8          | 10.41                  | -11.59                                  | 0.034           | 0.58   | 655.6  |
| 8                   | 233.45                     | 0.32                        | 33.53                | 1825.1          | 59.34                  | -11.93                                  | 0.072           | 0.94   | 1076.2 |
| 9                   | 203.97                     | 0.45                        | 25.55                | 1102.4          | 28.68                  | -11.05                                  | 0.043           | 0.61   | 631.7  |
| 10                  | 521.98                     | 0.31                        | 11.19                | 679.33          | 9.44                   | -10.94                                  | 0.023           | 0.63   | 660.6  |
| 11                  | 143.19                     | 0.49                        | 11.24                | 1697.1          | 6.19                   | -11.76                                  | 0.005           | 0.69   | 798    |
| 12                  | 62.66                      | 0.96                        | 13.24                | 1787.2          | 27.16                  | -12.34                                  | 0.036           | 0.68   | 848.4  |
| 13                  | 78.96                      | 0.81                        | 16.72                | 2252.3          | 41.57                  | -12.5                                   | 0.09            | 0.7    | 848.4  |
| 14                  | 140.85                     | 0.48                        | 16.67                | 2158.7          | 17.93                  | -11.93                                  | 0.08            | 0.87   | 995.7  |
| 15                  | 603.71                     | 0.43                        | 14.32                | 2159.3          | 19.29                  | -12.5                                   | 0.09            | 0.92   | 995.7  |
| 16                  | 929.61                     | 0.27                        | 12.8                 | 1802.7          | 8.74                   | -12.37                                  | 0.092           | 0.94   | 1028.8 |
| 17                  | 217.98                     | 0.55                        | 17.15                | 2536.3          | 37.29                  | -12.12                                  | 0.085           | 0.95   | 995.7  |
| 18                  | 189.71                     | 0.5                         | 19.23                | 2540.1          | 34.28                  | -12.12                                  | 0.082           | 0.71   | 848.4  |
| 19                  | 189.09                     | 0.43                        | 18.8                 | 2406.1          | 38.12                  | -12.12                                  | 0.079           | 0.71   | 848.4  |
| 20                  | 241.08                     | 0.34                        | 25.61                | 1586            | 29.87                  | -11.73                                  | 0.065           | 0.98   | 1076.2 |
| 21                  | 240.43                     | 0.36                        | 17.58                | 1310.2          | 16.17                  | -11.97                                  | 0.056           | 0.88   | 928.9  |
| 22                  | 214.66                     | 0.41                        | 26.15                | 1686.7          | 32.88                  | -11.58                                  | 0.107           | 1.05   | 1265.5 |
| 23                  | 762.79                     | 0.19                        | 12.7                 | 875.24          | 16.74                  | -11.44                                  | 0.003           | 0.88   | 842.6  |
| 24                  | 676.87                     | 0.25                        | 10.64                | 975.03          | 17.64                  | -11.73                                  | 0.033           | 0.84   | 842.6  |
| 25                  | 1307.8                     | 0.17                        | 7.93                 | 1159.5          | 9.23                   | -11.38                                  | 0.069           | 0.5    | 545.6  |
| 26                  | 434.37                     | 0.25                        | 29.84                | 1476.9          | 36.78                  | -11.88                                  | 0.064           | 0.6    | 631.7  |
| 27                  | 749.14                     | 0.21                        | 18.97                | 1294.4          | 15.55                  | -11.56                                  | 0.099           | 0.6    | 631.7  |
| 28                  | 892.62                     | 0.21                        | 15.98                | 995.88          | 7.23                   | -11.75                                  | 0.05            | 0.48   | 502.2  |
| 29                  | 1164.9                     | 0.18                        | 21.67                | 1536.2          | 15.96                  | -11.05                                  | 0.094           | 0.47   | 502.2  |
| 30                  | 153.06                     | 0.76                        | 15.67                | 2534            | 42.81                  | -12.5                                   | 0.089           | 0.74   | 848.4  |
| 31                  | 231.39                     | 0.54                        | 9.08                 | 1643.2          | 7.37                   | -12.24                                  | 0.088           | 0.66   | 798    |
| 32                  | 290.84                     | 0.41                        | 9.5                  | 1801.1          | 9.48                   | -11.21                                  | 0.079           | 0.77   | 890.3  |
| 33                  | 3424.4                     | 0.17                        | 20.18                | 1592.3          | 10.13                  | -11.75                                  | 0.048           | 0.8    | 896.1  |
| 34                  | 2062.2                     | 0.116                       | 13.88                | 1933.8          | 4.41                   | -12.035                                 | 0.068           | 0.68   | 737.6  |
| 35                  | 631.3                      | 0.308                       | 12.12                | 2085.6          | 16.37                  | -11.885                                 | 0.05            | 1.09   | 1128.3 |

*DD-Drainage density, Wi – Wetness index, P - Annual average precipitation*

**Table S3.** The maximum NSE on the monthly scale for the best parameters derived from calibration, validation, and stable sets, and standard deviations (std) of monthly NSE for calibration and validation.

| Catchment No | gauge location      | Monthly NSE (Calibration) | Monthly NSE (Validation) | NSE monthly (stable parameters) | std of monthly NSE (Calibration) | std of monthly NSE (Validation) |
|--------------|---------------------|---------------------------|--------------------------|---------------------------------|----------------------------------|---------------------------------|
| #01          | Bilate@Tena         | 0.82                      | 0.78                     | 0.75                            | 0.086                            | 0.248                           |
| #02          | Gelana@Tore bridge  | 0.75                      | 0.84                     | 0.67                            | 0.057                            | 0.098                           |
| #03          | Gidabo@Measso       | 0.77                      | 0.74                     | 0.69                            | 0.067                            | 0.252                           |
| #04          | Gedemso near Langan | 0.53                      | 0.70                     | 0.51                            | 0.007                            | 0.048                           |
| #05          | Woito @ bridge      | 0.63                      | 0.69                     | 0.58                            | 0.025                            | 0.055                           |
| #06          | Hamassa@Wajifo      | 0.60                      | 0.72                     | 0.55                            | 0.022                            | 0.056                           |
| #07          | Hare                | 0.72                      | 0.48                     | 0.70                            | 0.057                            | 0.412                           |
| #08          | Katar@Abura         | 0.83                      | 0.87                     | 0.80                            | 0.088                            | 0.244                           |
| #09          | kulfo@Arbaminch     | 0.80                      | 0.52                     | 0.80                            | 0.065                            | 0.339                           |
| #10          | Meki@Meki village   | 0.86                      | 0.96                     | 0.79                            | 0.097                            | 0.133                           |
| #11          | Gidabo@Bedesa       | 0.71                      | 0.84                     | 0.71                            | 0.050                            | 0.052                           |
| #12          | Katar@Fete          | 0.75                      | 0.88                     | 0.69                            | 0.064                            | 0.386                           |
| #13          | Katar@Timela        | 0.83                      | 0.86                     | 0.80                            | 0.079                            | 0.084                           |
| #14          | Gidabo@Aposto       | 0.79                      | 0.89                     | 0.79                            | 0.073                            | 0.264                           |

**Table S4.** Evaluation of the three different regression models from calibration, validation, and stable sets on both calibration (1995-2002) and validation periods (2003-2007). NSE was calculated on the Log transformed scale of observed and simulated discharge.

| Catchment No | Log NSE on calibration |            |               | Log NSE on validation |            |               |
|--------------|------------------------|------------|---------------|-----------------------|------------|---------------|
|              | NSE REGcal             | NSE REGval | NSE REGstable | NSE REGcal            | NSE REGval | NSE REGstable |
| #01          | 0.65                   | 0.64       | -0.03         | 0.38                  | 0.46       | -0.25         |
| #02          | 0.54                   | 0.60       | 0.50          | 0.47                  | 0.58       | 0.38          |
| #03          | -0.07                  | 0.32       | 0.56          | 0.12                  | 0.31       | 0.50          |
| #04          | 0.11                   | -0.91      | 0.52          | 0.15                  | -0.08      | 0.66          |
| #05          | 0.50                   | 0.51       | 0.52          | 0.05                  | -0.11      | 0.34          |
| #06          | 0.32                   | 0.64       | 0.60          | -0.72                 | 0.57       | 0.55          |
| #07          | 0.66                   | 0.62       | 0.54          | -1.04                 | -0.47      | 0.02          |
| #08          | 0.57                   | -0.43      | -0.61         | 0.73                  | 0.63       | 0.49          |
| #09          | -1.45                  | -0.33      | 0.53          | -5.91                 | -2.34      | -0.84         |
| #10          | 0.67                   | 0.59       | 0.71          | 0.78                  | 0.64       | 0.78          |
| #11          | 0.74                   | 0.81       | 0.61          | 0.69                  | 0.82       | 0.55          |
| #12          | 0.33                   | -0.13      | -0.50         | 0.61                  | 0.73       | 0.71          |
| #13          | -2.12                  | -0.29      | -0.99         | -1.04                 | 0.24       | -0.29         |
| #14          | 0.13                   | -0.47      | 0.16          | 0.45                  | 0.23       | 0.62          |
| Median       | 0.42                   | 0.42       | 0.52          | 0.27                  | 0.39       | 0.50          |

**Table S5.**  $R^2$  of weighted regression performance for the nine HBV parameters during the leave-one-out cross-validation.

| No | Parameters  |            |                          |                          |                          |           |                  |                                 |                |
|----|-------------|------------|--------------------------|--------------------------|--------------------------|-----------|------------------|---------------------------------|----------------|
|    | $\beta$ [-] | $F_c$ [mm] | $K_0$ [d <sup>-1</sup> ] | $K_1$ [d <sup>-1</sup> ] | $K_2$ [d <sup>-1</sup> ] | $L_P$ [-] | $M_{MAXBAS}$ [d] | $P_{MAX}$ [mm d <sup>-1</sup> ] | $V_{UZL}$ [mm] |
| 1  | 0.74        | 0.52       | 0.14                     | 0.47                     | 0.49                     | 0.39      | 0.55             | 0.56                            | 0.50           |
| 2  | 0.71        | 0.40       | 0.13                     | 0.44                     | 0.55                     | 0.41      | 0.66             | 0.57                            | 0.43           |
| 3  | 0.70        | 0.44       | 0.13                     | 0.59                     | 0.45                     | 0.56      | 0.61             | 0.59                            | 0.48           |
| 4  | 0.79        | 0.57       | 0.17                     | 0.29                     | 0.50                     | 0.47      | 0.50             | 0.63                            | 0.47           |
| 5  | 0.68        | 0.42       | 0.00                     | 0.39                     | 0.49                     | 0.51      | 0.51             | 0.65                            | 0.49           |
| 6  | 0.73        | 0.81       | 0.15                     | 0.46                     | 0.40                     | 0.47      | 0.47             | 0.49                            | 0.48           |
| 7  | 0.68        | 0.62       | 0.16                     | 0.44                     | 0.56                     | 0.52      | 0.59             | 0.60                            | 0.54           |
| 8  | 0.62        | 0.40       | 0.16                     | 0.43                     | 0.53                     | 0.34      | 0.50             | 0.53                            | 0.55           |
| 9  | 0.69        | 0.66       | 0.23                     | 0.44                     | 0.42                     | 0.47      | 0.58             | 0.62                            | 0.39           |
| 10 | 0.79        | 0.42       | 0.16                     | 0.61                     | 0.55                     | 0.49      | 0.47             | 0.60                            | 0.49           |
| 11 | 0.76        | 0.41       | 0.12                     | 0.50                     | 0.48                     | 0.37      | 0.61             | 0.56                            | 0.55           |
| 12 | 0.66        | 0.45       | 0.18                     | 0.43                     | 0.62                     | 0.52      | 0.52             | 0.53                            | 0.60           |
| 13 | 0.69        | 0.38       | 0.15                     | 0.43                     | 0.60                     | 0.44      | 0.52             | 0.50                            | 0.45           |
| 14 | 0.71        | 0.46       | 0.13                     | 0.55                     | 0.37                     | 0.56      | 0.50             | 0.66                            | 0.55           |

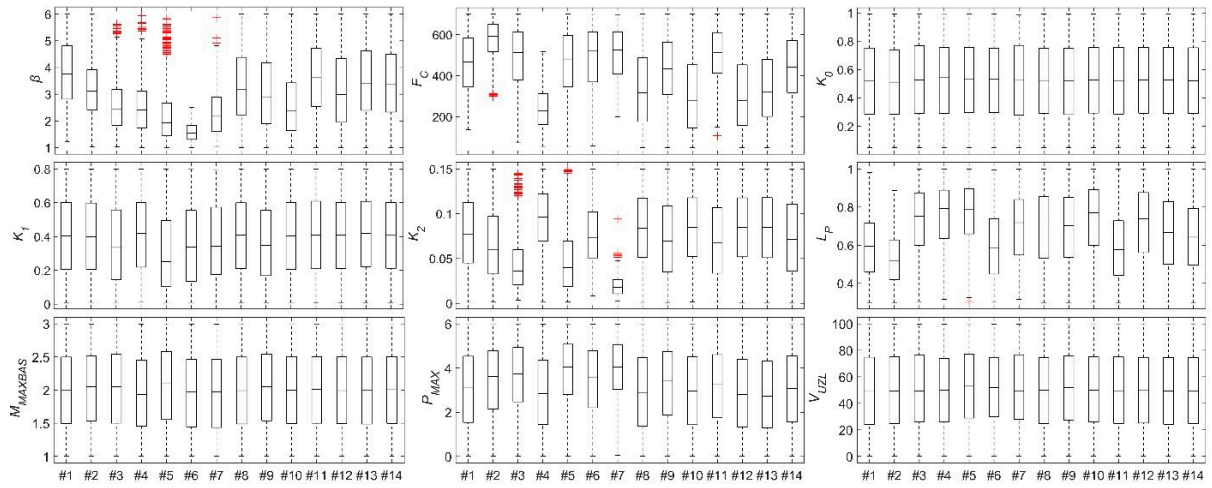

**Figure S1.** Confined ranges of model parameters derived during model calibration for each catchment.

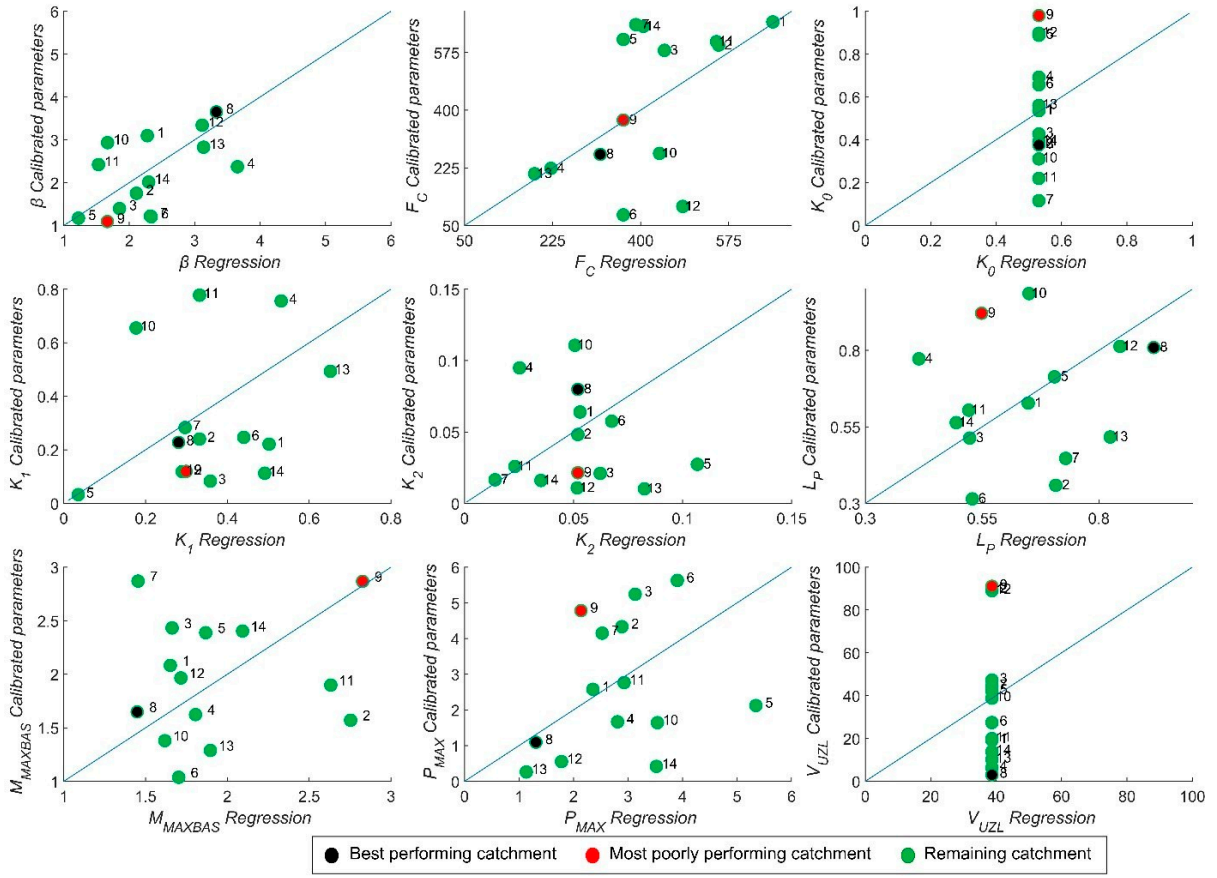

**Figure S2.** Scatter plots between best parameters estimated from calibration and parameters derived from the regression model. The black circle (catchment #8) represents best performing catchment from parameter estimation and its corresponding parameters from regression. The red circle (catchment #9) represents the most poorly performing catchment by the regression model. For unidentifiable parameters ( $K_0$  and  $V_{UZL}$ ) their median value was taken for the regionalized model.

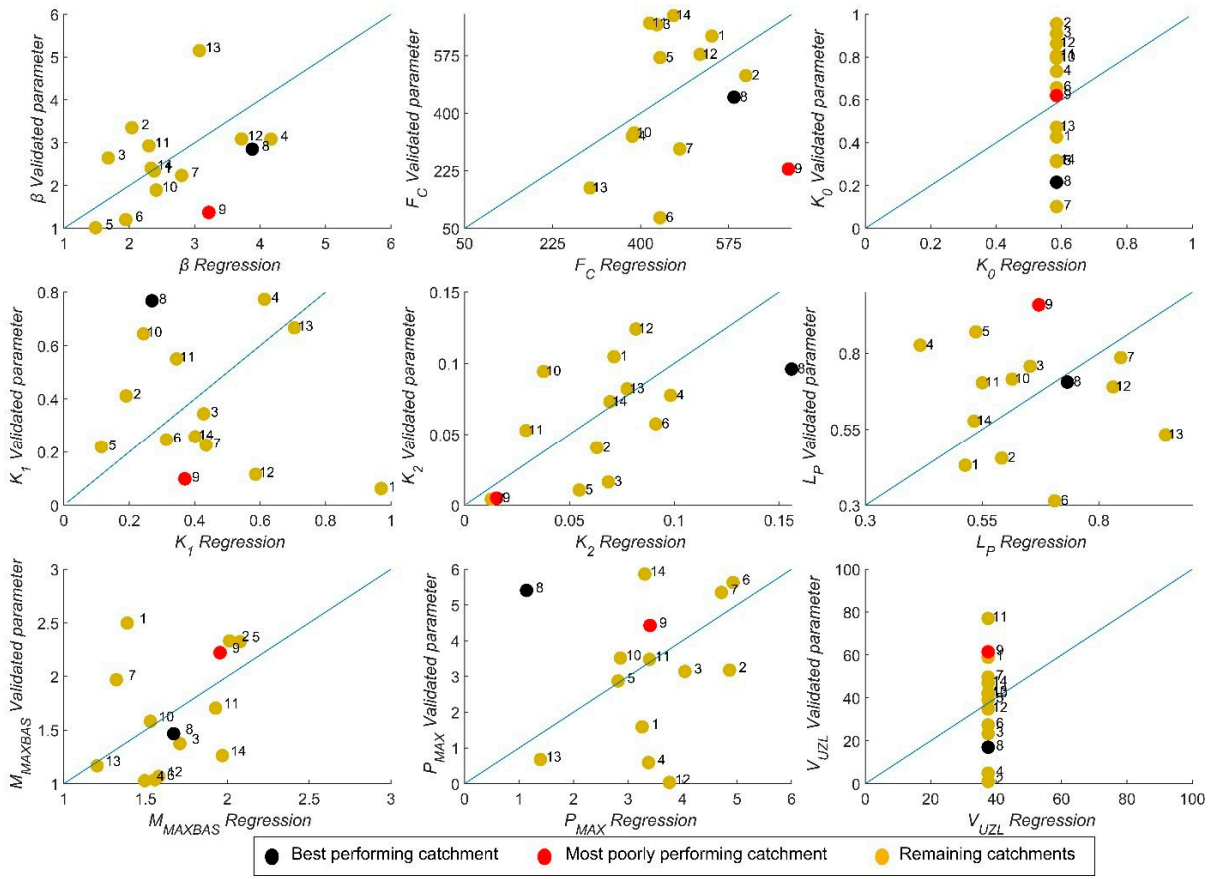

**Figure S3.** Scatter plots between best parameters estimated from validation and parameters derived from the regression model. The black circle (catchment #8) represents best performing catchment from parameter estimation and its corresponding parameters from regression. The red circle (catchment #9) represents the most poorly performing catchment by the regression model. For unidentifiable parameters ( $K_0$  and  $V_{UZL}$ ) their median value was taken for the regionalized model.
